# Supplementary material
Source: PubMed Central journal article supplement (PMC6663911)

## Supplemental material

Supplemental Table S1 - Details of all primer sequences and their regions used in this study

| LSP       |                     |                                    | Ref |
|-----------|---------------------|------------------------------------|-----|
| <b>RD</b> | <b>239</b>          |                                    | (1) |
|           | RD size             | 842                                |     |
|           | <b>Lineage 1</b>    |                                    |     |
|           | Flanking region L   | ACGGCCGCAT                         |     |
|           | Flanking region R   | GCTACCGTTG                         | (1) |
|           | Primer sequence L   | GCCAAAGCCTGACCAGCATC               |     |
|           | Primer sequence int | CCGTAGGTGATCTCGACCTC               |     |
|           | Primer sequence R   | GGATTCATCGACGCAATCTGACC            |     |
|           | Tm                  | 59                                 |     |
|           | PCR product size    | 79+100 (absent*) / 238 (present**) |     |
| <b>RD</b> | <b>105</b>          |                                    |     |
|           | RD size             | 3466                               |     |
|           | <b>Lineage 2</b>    |                                    |     |
|           | Flanking region L   | CGTGGTCGCC                         |     |
|           | Flanking region R   | GTGGGACGGG                         |     |
|           | Primer sequence L   | ACAGCGCGGGTCATATCAC                |     |
|           | Primer sequence int | TGAATCGACTTTGTTGCCGG               |     |
|           | Primer sequence R   | CACCGTCGTTTTCTGCCGA                |     |
|           | Tm                  | 59                                 |     |
|           | PCR product size    | 185+126 (absent) / 229 (present)   |     |
| <b>RD</b> | <b>750</b>          |                                    |     |
|           | RD size             | 790                                |     |
|           | <b>Lineage 3</b>    |                                    |     |
|           | Flanking region L   | GACGGAGTGC                         |     |
|           | Flanking region R   | ATTGGTACTT                         |     |
|           | Primer sequence L   | TGGCGGCCAAGATGACATTT               |     |
|           | Primer sequence int | GGAGACGACGGTGTGTTTTTC              |     |
|           | Primer sequence R   | AAAACCTTTCGGCGGTCAGTG              |     |
|           | Tm                  | 61                                 |     |

|                     |                     |                                  |     |
|---------------------|---------------------|----------------------------------|-----|
|                     | PCR product size    | 106+126 (absent) / 323 (present) |     |
| <b>Pks 15/1</b>     |                     |                                  |     |
| <b>Lineage 4</b>    | RD size             | 7                                |     |
|                     | Flanking region L   | GCCGCGGCC                        |     |
|                     | Flanking region R   | CCGGTGCTTT                       |     |
|                     | Primer sequence L   | CTGGGTTGGCCTGCACGTGGGCCATAA      |     |
|                     | Primer sequence int | -                                |     |
|                     | Primer sequence R   | GCCCCGCAGAGGCGCCGGTT             |     |
|                     | Tm                  | 62                               |     |
|                     | PCR product size    | 144 (absent) / 144+7 (present)   |     |
| <b>RD 181</b>       |                     |                                  |     |
| <b>Sublineage 2</b> | RD size             | 710                              |     |
|                     | Flanking region L   | GGGACCAAGC                       | (1) |
|                     | Flanking region R   | AGGTCGTACG                       | (1) |
|                     | Primer sequence L   | CAGCACAAATCCGCCATAC              |     |
|                     | Primer sequence int | GTCATTGGTTGTGCGGCA               |     |
|                     | Primer sequence R   | CGATCTGCAGGTTGGTCTTG             |     |
|                     | Tm                  | 59                               |     |
|                     | PCR product size    | 92+151 (absent) / 180 (present)  |     |
| <b>RD 150</b>       |                     |                                  |     |
| <b>Sublineage 2</b> | RD size             | 2486                             |     |
|                     | Flanking region L   | ACGTTTCGTAT                      | (1) |
|                     | Flanking region R   | CTAGCGCGTC                       | (1) |
|                     | Primer sequence L   | CGGTTGGTACTTACGGTGTCT            |     |
|                     | Primer sequence int | TTAGCTCCTCCGCTGAGAC              |     |
|                     | Primer sequence R   | CGAGCGGCTTGATGAACTC              |     |
|                     | Tm                  | 59                               |     |
|                     | PCR product size    | 57+86 (absent) / 202 (present)   |     |
| <b>RD 142</b>       |                     |                                  |     |
| <b>Sublineage 2</b> | RD size             | 2850                             |     |
|                     | Flanking region L   | CATCGGCGTG                       | (1) |

|                     |                                |     |
|---------------------|--------------------------------|-----|
| Flanking region R   | GCCGTGCTGC                     | (1) |
| Primer sequence L   | CACGACCCGGTAAGTGCG             |     |
| Primer sequence int | TGTGCCTATTGACGGCCTTA           |     |
| Primer sequence R   | TAGCACCAGTACCGGATGTC           |     |
| Tm                  | 59                             |     |
| PCR product size    | 84+60 (absent) / 195 (present) |     |

---

\* absent = RD absent, which means identification of the specific lineage; \*\* present = RD present, which means that the specific lineage is not identified.

Reference:

1. Tsolaki AG, Hirsh AE, DeRiemer K, Enciso JA, Wong MZ, Hannan M, Goguet de la Salmoniere Y-OL, Aman K, Kato-Maeda M, Small PM. 2004. Functional and evolutionary genomics of *Mycobacterium tuberculosis*: insights from genomic deletions in 100 strains. *Proc Natl Acad Sci U S A* 101:4865–4870.

## Supplemental Figure S1 – Study flow

Study flow of samples analyzed in the current study. Samples were tested with a PCR based method to identify the presence or absence of RD239 (lineage 1), RD105 (lineage 2), RD750 (lineage 3) and the presence or absence of RD181, RD150 or RD142 (subsets of lineage 2). Lineage 4 was genotyped by sequencing of obtained PCR products and we could successfully determine the presence or absence of pks 15/1 in 46 cases (bold). Data from lineage 1, 2 and 3 are inconclusive since these data are not confirmed by sequencing. \*Missing results due to poor DNA quality; \*\*missing results due to limited amount of DNA or PCR not performed when PCR products of at least three different regions showed degraded DNA.

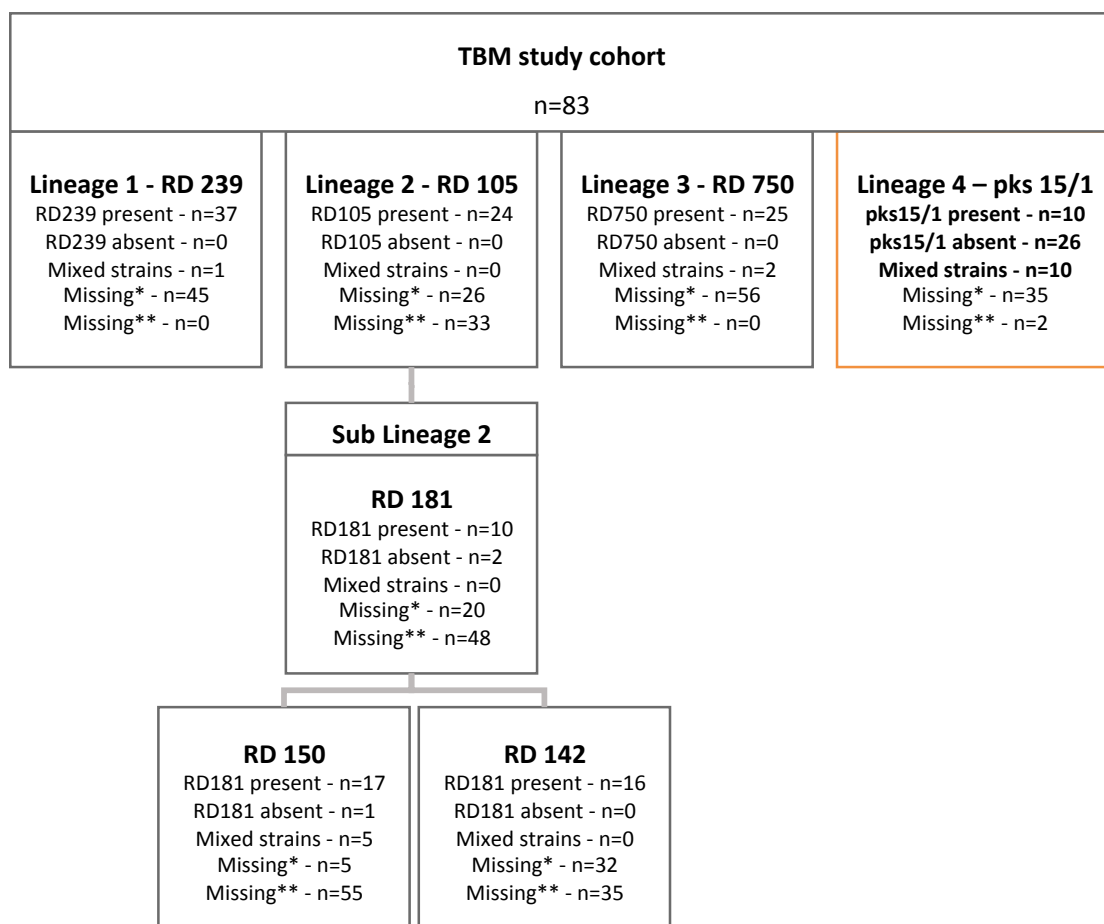

Supplement: JCM.00415-19-s0001.pdf [file JCM.00415-19-s0001.pdf]
